# Supplementary material
Source: Springer Nature journal article supplement (https://www.springermedizin.de/resource/supplementary/12887_2014_1206_MOESM8_ESM.pdf/9476674)

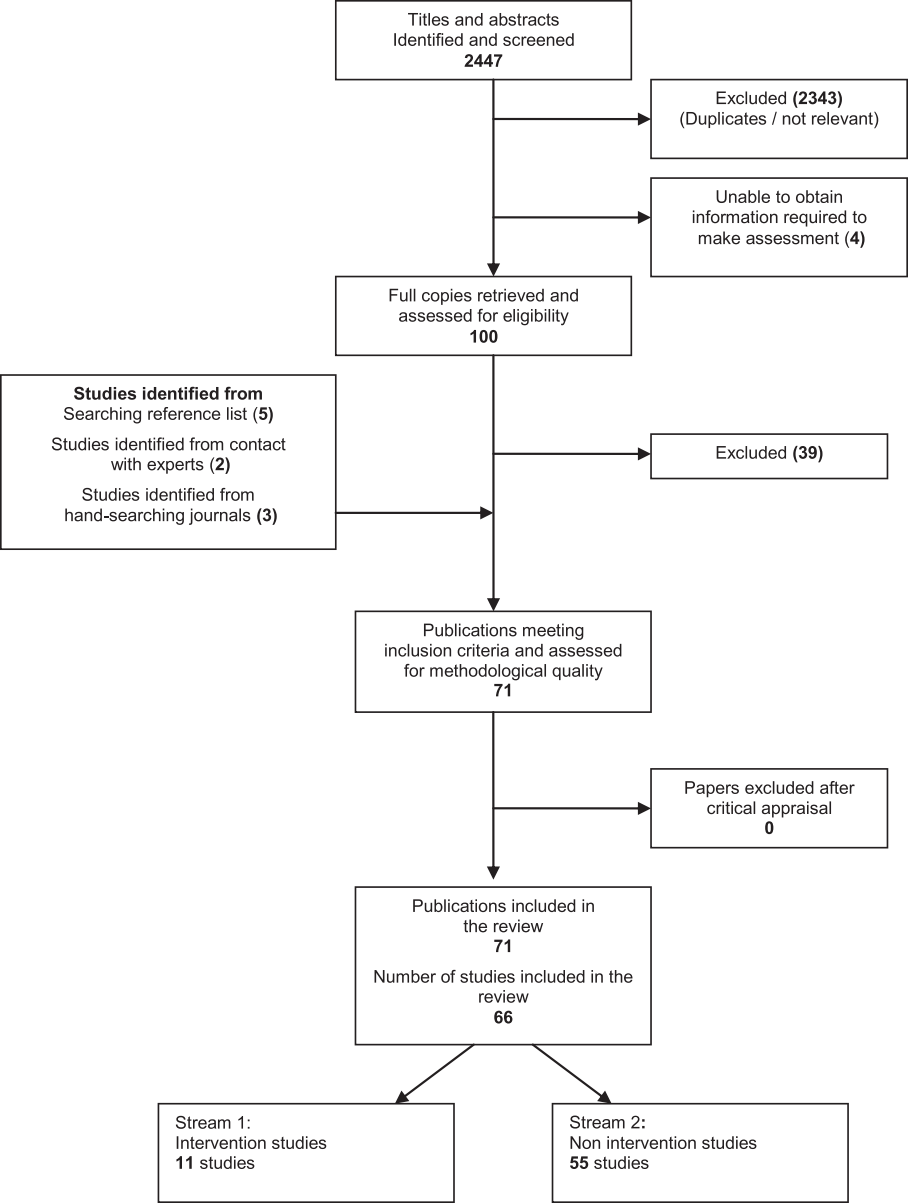

Supplement: MOESM8 [file 9476674]
